# Supplementary material for: Immunoinformatic Responses of Host MHC I/II and CD4+ Cells Against Conserved Spike Fragments of SARS CoV-2 of 186 Countries With In-Silico Mutations: Implications in Universal Vaccination
Source: Research Square preprint supplement (doi:10.21203/rs.3.rs-403298/v1), 2021-04-14
Supplement: Supplementary file 1 [file 9e9ca38dfec72566b6ca7a2b.docx]

|  |  |  |
| --- | --- | --- |
| Class1 Immunogenicity |  |  |
| CUT4 |  |  |
| peptide | length | score |
| VLAWNTRNIDATSTGNYNYKYRLFRKSNLKPFERDISTEIYQAGSTPCNGVEGFNCYFPLQSYGFQPTNGVGYQPYRVVVLSFE | 84 | 0.27813 |
|  |  |  |
| CUT4SM3 |  |  |
| peptide | length | score |
| VLAWNTRNIDATSTGNYNYKYRLFRKSNLKPFERDISTEIYQAGSTPCNGVEGFNCYFPLQSYGFQPSNGVGYQPYRVVVLSFE | 84 | 0.07923 |
|  |  |  |
| CUT4DM2 |  |  |
| peptide | length | score |
| VLAWNTRNIDATSTGNYNYKYRLFRKSNLKPFERDISTEIYQAGSTPCNGVEGFNCSFPLQSYGFQPSNGVGYQPYRVVVLSFE | 84 | -0.07827 |
|  |  |  |
| CUT4TM2 |  |  |
| peptide | length | score |
| VLAWNTRNIDATSTGNYNYKSRLFRKSNLKPFERDISTEIYQAGSTPCNGVEGFNCSFPLQSYGFQPYNGVGYQPYRVVVLSFE | 84 | -0.07827 |

**S Table 1 class1 immunogenicity has been shown in response to several Cut4 mutants**

**S Table 2 CD4+ immunogenicity of different mutants of Cut4 SARS CoV spike proteins**

contd.....

Contd..

**S Table 3 MHC ClassII responses by different allele against the cut4**

**S Table 4. MHC ClassI responses by different allele against the cut4**

|  | **CUTs** | | | | | |
| --- | --- | --- | --- | --- | --- | --- |
| Rank | Mutation |  | Sequence |  | Antigenicity | Remarks |
| **1** | CUT4 | VLAWNTRNIDATSTGNYNYKYRLFRKSNLKPFERDISTEIYQAGSTPCNGVEGFNCYFPLQSYGFQPTNGVGYQPYRVVVLSFE | | | **0.6478** | Probable antigen |
| **2** | SM3 | VLAWNTRNIDATSTGNYNYKYRLFRKSNLKPFERDISTEIYQAGSTPCNGVEGFNCYFPLQSYGFQPSNGVGYQPYRVVVLSFE | | | **0.6373** | Probable antigen |
| **3** | DM2 | VLAWNTRNIDATSTGNYNYKYRLFRKSNLKPFERDISTEIYQAGSTPCNGVEGFNCSFPLQSYGFQPSNGVGYQPYRVVVLSFE | | | **0.6197** | Probable antigen |
| **4** | TM2 | VLAWNTRNIDATSTGNYNYKSRLFRKSNLKPFERDISTEIYQAGSTPCNGVEGFNCSFPLQSYGFQPYNGVGYQPYRVVVLSFE | | | **0.6501** | Probable antigen |
| **EPITOPES** | | | | | | |
| Rank | Mutation | Location | Epitope | Score | Antigenicity | Remarks |
| **1** |  | 32 - 41 | FERDISTEIY | 1.000 | **-0.7585** | Probable Non antigen |
| **2** | Y453 | 20 - 29 | KYRLFRKSNL | 0.844 | **-0.2129** | Probable Non antigen |
| **2a** | Y453S | 20-29 | KSRLFRKSNL |  | **0.0327** | Probable Non-antigen |
| **3** | Y489 | 49 - 58 | NGVEGFNCYF | 0.608 | **0.6268** | Probable antigen |
| **3a** | Y489S | 49-58 | NGVEGFNCSF |  | **0.5729** | Probable antigen |
| **4** |  | 6 - 15 | TRNIDATSTG | 0.595 | **1.2404** | Probable antigen |
| **5** | T500 | 65 - 74 | FQPTNGVGYQ | 0.593 | **0.4639** | Probable antigen |
| **5a** | T500S | 65 - 74 | FQPSNGVGYQ | 0.593 | **0.4180** | Probable antigen |
| **5b** | T500Y | 65 - 74 | FQPYNGVGYQ |  | **0.5059** | Probable antigen |

**S Table 4.** Antigenecity analysis of CUT4 normal, CUT4 mutant (SM3, DM2 and TM2) and different unmutated and mutated epitope.

**S Figure 1:** Alignment of 5 predicted epitope sequences with selected 103 protein sequence of nCOV2 spike glycoproteins. Result showed that, epitope sequence 1, 2, 3 and 5 have complete sequence similarity. But epitope 5 showed less similarity or dissimilarity with others.
